# Supplementary material for: Cellular organization in lab-evolved and extant multicellular species obeys a maximum entropy law
Source: eLife journal article supplement (doi:10.7554/elife.72707), 2022-01-04
Supplement: fig5-data1 [file 2021-03-26-Petite-Gob21-Ace2KO-01.xlsx]

## Sheet: Sheet1
Sequence	Diameter
	µm
1	20.14
2	34.09
3	16.55
4	20.75
5	16.81
6	21.16
7	17.47
8	24.71
9	18.95
10	18.02
11	13.68
12	16.07
13	12.85
14	27.59
15	13.84
16	14.55
17	26.19
18	18.25
19	13.69
20	16.86
21	17.64
22	26.59
23	8.452
24	16.32
25	10.18
26	12.32
27	11.95
28	20.87
29	25.63
30	30.18
31	5.367
32	19.62
33	18.15
34	15.61
35	11.65
36	20.79
37	18.27
38	22.09
39	20.4
40	16.82
41	12.42
42	20.79
43	14.18
44	24.44
45	17.18
46	18.62
47	26.09
48	17.33
49	20.78
50	9.152
51	9.158
52	10.94
53	14.83
54	17.49
55	23.13
56	22.16
57	20.64
58	19.44
59	4.812
60	16.51
61	12.14
62	24
63	16.11
64	26.03
65	13.71
66	14.22
67	14.49
68	22.28
69	17.77
70	18.78
71	12.18
72	8.046
73	15.85
74	23.18
75	11.13
76	12.25
77	24.74
78	22.94
79	16.94
80	11.23
81	10.32
82	16.51
83	22.85
84	15.58
85	24.53
86	22.4
87	8.077
88	16.15
89	11.84
90	8.277
91	20.81
92	23.12
93	23.18
94	13.91
95	5.614
96	19.17
97	12.73
98	7.509
99	30.46
100	17.74
101	13.5
102	11.85
103	12.77
104	15.67
105	11.18
106	9.046
107	15.74
108	15.45
109	25.64
110	19.41
111	10.99
112	22.03
113	12.81
114	9.227
115	21.68
116	5.219
117	21.63
118	13.84
119	15.49
120	25.91
121	10.59
122	26.62
123	11.63
124	14.76
125	24.48
126	17.22
127	20.64
128	16.52
129	9.144
130	24.38
131	18.64
132	19.55
133	14.77
134	8.214
135	10.05
136	16.18
137	22.66
138	17.48
139	18.77
140	11.39
141	14.37
142	19.98
143	22.08
144	14.94
145	26.59
146	13.88
147	17.71
148	21.22
149	16.18
150	25.96
151	10.18
152	24.53
153	9.504
154	18.05
155	17.13
156	16.91
157	28.7
158	13.22
159	19.02
160	26.42
161	21.98
162	27.3
163	10.9
164	23.98
165	4.078
166	13.96
167	21.32
168	5.523
169	16.24
170	11.33
171	13.8
172	6.225
173	30.37
174	22.55
175	11.32
176	7.458
177	5.672
178	11.38
179	17.24
180	9.206
181	24.29
182	14.1
183	11.18
184	23.64
185	21.15
186	15.62
187	14.9
188	17.05
189	8.64
190	9.055
191	17.65
192	12.1
193	22.17
194	6.946
195	15.51
196	21.74
197	18.51
198	22.37
199	25.31
200	12.77
201	19.55
202	15.74
203	20.28
204	22.47
205	19.46
206	13.53
207	7.558
208	13.9
209	19.62
210	15.32
211	15.39
212	19.38
213	19.18
214	18.47
215	24.14
216	19.06
217	15.21
218	23.09
219	18.26
220	21.87
221	10.91
222	20.41
223	14.82
224	11.92
225	15.44
226	12.79
227	18.2
228	23.61
229	32.72
230	14.71
231	24.92
232	19.65
233	26.84
234	28.73
235	21.46
236	17.8
237	13.2
238	24.14
239	19.08
240	23.58
241	15.11
242	21.05
243	21.18
244	10.42
245	8.146
246	5.063
247	5.082
248	15.77
249	11.08
250	14.62
251	27.06
252	21.34
253	9.274
254	21.8
255	13.93
256	16.91
257	27.09
258	18.39
259	18.65
260	4.875
261	16.97
262	9.751
263	7.499
264	17.96
265	12.95
266	15.91
267	9.804
268	16.37
269	16.64
270	22.92
271	14.62
272	21.32
273	25.82
274	23.34
275	24.83
276	13.65
277	8.557
278	6.697
279	27.68
280	14.24
281	22.23
282	16.16
283	21.69
284	26.15
285	24.03
286	10.96
287	13.76
288	18.4
289	13.17
290	12.46
291	30.64
292	18.01
293	6.296
294	21.78
295	21.44
296	13.81
297	18.89
298	21.34
299	15.99
300	14.69
301	16.31
302	9.614
303	22
304	14.56
305	20
306	6.726
307	12.72
308	13.3
309	17.61
310	15.53
311	15.6
312	23.7
313	16.26
314	27.12
315	8.553
316	18.7
317	8.404
318	9.454
319	18.39
320	15.06
321	17.93
322	23.57
323	22.16
324	14.12
325	14.29
326	12.61
327	22.96
328	12.46
329	19.86
330	12.31
331	19.21
332	15.27
333	19.96
334	21.63
335	16.73
336	17.31
337	25.93
338	17.39
339	14.15
340	23.02
341	23.35
342	9.63
343	28.19
344	8.329
345	18.26
346	26.94
347	14.62
348	16.61
349	12.69
350	13.7
351	28.58
352	20.77
353	27.44
354	17.94
355	5.346
356	19.67
357	21.63
358	30.03
359	29.4
360	23.74
361	17.65
362	21.64
363	23.15
364	11.86
365	15.58
366	12.12
367	18.71
368	10.38
369	10.11
370	10.74
371	16.17
372	10.11
373	21.47
374	16
375	13.5
376	14.84
377	26.14
378	17.5
379	13.29
380	12.26
381	13.81
382	24.86
383	17.91
384	24.33
385	10.93
386	20.78
387	16.9
388	22.56
389	14.29
390	17.2
391	19.53
392	9.419
393	16.95
394	24.92
395	16.98
396	19.84
397	31.67
398	30.73
399	23.78
400	18.23
401	16.18
402	19.78
403	26.49
404	20.55
405	21.28
406	11.93
407	36.44
408	22.86
409	21.53
410	16.55
411	12.49
412	4.721
413	19.72
414	21.35
415	20.5
416	20.48
417	16.56
418	12.73
419	12.85
420	21.98
421	9.837
422	15.74
423	18
424	12.75
425	12.78
426	20.32
427	22.7
428	11.66
429	9.143
430	11.97
431	5.36
432	12.33
433	20.78
434	21.69
435	14.57
436	19.28
437	17.48
438	21.11
439	4.386
440	26.66
441	22.48
442	18.65
443	12.53
444	12.8
445	4.718
446	20.77
447	19.13
448	16.72
449	7.269
450	11
451	23.9
452	24.29
453	18.77
454	27.73
455	17.24
456	18.75
457	18.41
458	13.69
459	9.049
460	14.15
461	15.21
462	11.1
463	22.53
464	12.16
465	19.82
466	18.98
467	14.63
468	11.84
469	15.92
470	15.11
471	26.4
472	17.88
473	8.155
474	10.19
475	18.42
476	13.89
477	16.37
478	18.16
479	16.49
480	9.074
481	23.87
482	17.43
483	10.79
484	19.67
485	15.17
486	10.95
487	17.33
488	23.36
489	14.6
490	26.21
491	14.27
492	21.1
493	12.3
494	22.01
495	25.42
496	22.39
497	16.2
498	16.32
499	20.56
500	8.649
501	4.827
502	20.64
503	24.41
504	5.799
505	5.409
506	14.41
507	24.92
508	29.16
509	20.74
510	10.88
511	27.19
512	13.75
513	4.857
514	17.86
515	19.54
516	19.29
517	4.579
518	8.273
519	15.58
520	20.72
521	17.56
522	12.32
523	20.15
524	22.47
525	15.93
526	15.49
527	16.66
528	11.42
529	10.76
530	15.06
531	18.65
532	15.82
533	14.31
534	25.63
535	10.1
536	24.75
537	17.11
538	23.25
539	23.55
540	13.69
541	19.76
542	18.63
543	11.03
544	17.89
545	21.09
546	5.996
547	17.66
548	15.1
549	19.79
550	12.32
551	21.62
552	25.51
553	18.24
554	24.13
555	21.61
556	22.9
557	11.12
558	15.11
559	22.33
560	14.2
561	12.73
562	16.17
563	4.87
564	22.95
565	4.08
566	26.29
567	23.38
568	17.63
569	11.39
570	16.51
571	27.24
572	14.71
573	34.97
574	18
575	10.81
576	18.05
577	20.54
578	22.82
579	12.7
580	7.744
581	15.82
582	10.85
583	17.56
584	20.26
585	24.05
586	19.89
587	14.12
588	26.58
589	16.01
590	20.91
591	18.89
592	23.33
593	14.98
594	23.05
595	19.72
596	18.28
597	5.006
598	15.11
599	22.49
600	22.77
601	19.71
602	21.2
603	24.04
604	8.954
605	16.65
606	8.558
607	19.62
608	16
609	17.13
610	19.01
611	19.93
612	26.31
613	17.31
614	18.05
615	10.84
616	24.19
617	23.13
618	20.28
619	22.82
620	23.82
621	15.85
622	5.05
623	7.713
624	22.07
625	22.78
626	12.15
627	11.65
628	18.05
629	21.05
630	16.97
631	8.878
632	20.1
633	9.523
634	26.07
635	15.38
636	23.55
637	26.14
638	19.41
639	20.8
640	20.24
641	25.33
642	18.91
643	12.98
644	23.72
645	17.49
646	20.17
647	26.49
648	18.19
649	13.7
650	17
651	15.76
652	25.52
653	20.45
654	4.84
655	10.5
656	7.024
657	21.64
658	8.172
659	19.78
660	15.84
661	17.15
662	16.75
663	8.386
664	12.3
665	24.75
666	11.95
667	17.62
668	13.93
669	18.27
670	21.27
671	31.09
672	5.889
673	20.47
674	16.69
675	20.99
676	26.83
677	17.99
678	17.09
679	23
680	10.29
681	22.43
682	16.41
683	16.45
684	12.76
685	20.25
686	16.2
687	15.52
688	24.13
689	4.506
690	7.206
691	22.5
692	13
693	17.28
694	20.43
695	21.4
696	26.03
697	11.11
698	20.86
699	25.55
700	8.349
701	22.09
702	11.53
703	11.71
704	19
705	16.25
706	23.45
707	10.33
708	20.19
709	19.5
710	19.38
711	20.44
712	17.71
713	17.42
714	12.66
715	23.09
716	16.67
717	16.42
718	22.32
719	18.49
720	20.62
721	14.54
722	16.63
723	16.55
724	29.75
725	9.363
726	21.05
727	18.22
728	24.58
729	11.34
730	20.25
731	4.264
732	15.58
733	20.19
734	13.81
735	16.6
736	21.63
737	12.4
738	14.76
739	22.08
740	26.33
741	19.63
742	22.81
743	13.64
744	18.99
745	17.96
746	18.51
747	9.854
748	23.83
749	22.71
750	14.22
751	15.99
752	26.96
753	22.65
754	24.36
755	28.72
756	23.91
757	18.27
758	11.77
759	14.46
760	12.42
761	28.33
762	20.48
763	19.43
764	23.71
765	12.96
766	18.84
767	15.09
768	17.28
769	24.09
770	21.04
771	24.52
772	26.1
773	16.14
774	12.61
775	5.845
776	16.08
777	18.73
778	26.23
779	11.7
780	17.89
781	13.35
782	21.23
783	20.82
784	20.23
785	18.16
786	23.76
787	12.07
788	21.89
789	14.74
790	8.214
791	6.98
792	18.59
793	4.119
794	20.55
795	9.051
796	19.07
797	13.37
798	12.96
799	11.6
800	17.5
801	16.71
802	20.26
803	6.974
804	19.11
805	13.41
806	11.89
807	13.43
808	15.25
809	20.73
810	16.52
811	21.63
812	20.64
813	23.57
814	24.55
815	16.41
816	20.03
817	24.83
818	19.44
819	16.89
820	14.87
821	16.79
822	26.24
823	15.48
824	22.46
825	15.31
826	6.457
827	14.1
828	10.58
829	24.29
830	26.12
831	22.43
832	22.6
833	17.82
834	24.49
835	14.31
836	19.72
837	14.85
838	10.48
839	20.2
840	4.432
841	24.24
842	30.4
843	15.18
844	8.369
845	20.05
846	12
847	23
848	19.1
849	19.09
850	13.11
851	6.914
852	19.36
853	20.61
854	13.46
855	17.29
856	14.97
857	16.13
858	22.75
859	15.72
860	9.973
861	13.36
862	30.72
863	20.72
864	13.28
865	15.42
866	25.85
867	16.65
868	8.808
869	19.73
870	20.78
871	13.46
872	22.12
873	19.86
874	19.91
875	20.39
876	15.95
877	9.854
878	21.37
879	8.954
880	27.19
881	15.41
882	29.17
883	22.5
884	17.53
885	12.67
886	10.59
887	16.28
888	17.93
889	8.772
890	15.65
891	14.05
892	6.634
893	12.44
894	22.53
895	12.95
896	7.912
897	20.04
898	18.76
899	15.65
900	17.4
901	21.84
902	19.69
903	13
904	13.23
905	20.67
906	20.62
907	16.19
908	20.34
909	18.08
910	13.57
911	5.2
912	23.23
913	17.77
914	22.2
915	17.62
916	10.11
917	6.739
918	19.63
919	12.16
920	17.21
921	16.2
922	23.71
923	6.883
924	13.61
925	17.58
926	19.42
927	14.07
928	18.24
929	4.301
930	12.25
931	5.01
932	18.94
933	10.05
934	13.6
935	21.45
936	21.98
937	23.22
938	11.67
939	14.25
940	13.92
941	13.16
942	10.29
943	18.82
944	22.69
945	25.21
946	22.3
947	11.94
948	16.73
949	17.98
950	22.62
951	22.01
952	11.12
953	14.85
954	22.88
955	15.21
956	20.47
957	11.84
958	11.5
959	4.242
960	16.86
961	25.74
962	18.15
963	13.78
964	17.04
965	9.388
966	22.61
967	7.254
968	4.165
969	14.36
970	9.787
971	16.52
972	18.3
973	18.05
974	15.61
975	10.2
976	19.38
977	15.04
978	22.41
979	8.592
980	21.49
981	15.13
982	17.21
983	11.48
984	20.7
985	20.89
986	19.77
987	21.97
988	8.234
989	22.08
990	5.233
991	13.83
992	17.78
993	22.71
994	17.68
995	25.2
996	17.52
997	27.44
998	15.92
999	7.983
1000	11.27
1001	21.44
1002	17.41
1003	22.27
1004	21.5
1005	19.45
1006	29.81
1007	19.92
1008	15.27
1009	17.19
1010	20.63
1011	18.81
1012	20.81
1013	24.09
1014	22.27
1015	16.8
1016	19.37
1017	17.31
1018	10.91
1019	16.18
1020	18.25
1021	20.42
1022	17.83
1023	11.48
1024	16.6
1025	11.55
1026	17.81
1027	14.68
1028	18.19
1029	4.441
1030	18.77
1031	20.68
1032	23.39
1033	10.59
1034	18.95
1035	16.81
1036	13.48
1037	13.3
1038	19.69
1039	16.49
1040	13.17
1041	15.2
1042	11.36
1043	15.38
1044	19.29
1045	21.39
1046	11.9
1047	29.31
1048	22.37
1049	13.86
1050	17.59
1051	14.29
1052	10.4
1053	12.39
1054	9.882
1055	14.58
1056	16.74
1057	17.32
1058	19.33
1059	27.02
1060	18.18
1061	16.7
1062	17.82
1063	24.2
1064	14.25
1065	11.16
1066	4.261
1067	18.12
1068	21.03
1069	13.21
1070	17.92
1071	28.71
1072	22.53
1073	19.07
1074	21.57
1075	5.329
1076	6.814
1077	23.67
1078	31.99
1079	24.51
1080	17.21
1081	24.27
1082	8.342
1083	9.934
1084	18.52
1085	15.32
1086	12.23
1087	15.93
1088	11.41
1089	18.96
1090	8.476
1091	19.52
1092	21.23
1093	7.43
1094	21.68
1095	14.85
1096	15.48
1097	19.94
1098	4.352
1099	22.48
1100	4.401
1101	19.52
1102	19.67
1103	20.76
1104	29.69
1105	20.95
1106	15.42
1107	14.81
1108	4.787
1109	22.04
1110	23.11
1111	18.93
1112	19.72
1113	9.891
1114	15.2
1115	16.33
1116	12.06
1117	17.24
1118	22.39
1119	21.7
1120	16.44
1121	4.027
1122	22.29
1123	20.67
1124	17.63
1125	13.1
1126	32.43
1127	10.9
1128	22.17
1129	12.38
1130	17.07
1131	14.39
1132	13.72
1133	16.01
1134	14.45
1135	14.45
1136	17.87
1137	15.78
1138	7.459
1139	18.63
1140	10.72
1141	17.97
1142	4.237
1143	30.48
1144	35.36
1145	19.95
1146	25.55
1147	23.15
1148	5.535
1149	22.01
1150	16.54
1151	16.42
1152	8.512
1153	6.735
1154	13.7
1155	9.95
1156	24.25
1157	6.187
1158	21.14
1159	17.95
1160	12.11
1161	17.62
1162	11.53
1163	8.645
1164	12.8
1165	12.79
1166	4.586
1167	14.69
1168	6.08
1169	19.21
1170	17.06
1171	24.32
1172	19.17
1173	10.98
1174	21.57
1175	16.64
1176	13.2
1177	14.13
1178	23.16
1179	22.15
1180	21.71
1181	19.86
1182	18.27
1183	14.92
1184	20.04
1185	19.55
1186	4.122
1187	10.01
1188	16.9
1189	14.32
1190	10.76
1191	15.49
1192	19.25
1193	18.73
1194	18.02
1195	23.63
1196	21.3
1197	19.15
1198	19.61
1199	4.045
1200	15.18
1201	12.5
1202	21.24
1203	4.059
1204	19.35
1205	20.14
1206	14.77
1207	5.792
1208	20.99
1209	9.787
1210	12.59
1211	11.61
1212	13.16
1213	16.8
1214	13.81
1215	21.62
1216	19.38
1217	14.96
1218	17.59
1219	14.02
1220	20.64
1221	12.71
1222	18.34
1223	21.05
1224	11.39
1225	15.77
1226	25.5
1227	23.01
1228	24.26
1229	4.853
1230	14.08
1231	26.43
1232	8.573
1233	16.05
1234	8.398
1235	18
1236	16.58
1237	4.373
1238	14.43
1239	21.32
1240	19.48
1241	22.87
1242	15.89
1243	16.4
1244	17.72
1245	12.79
1246	17.59
1247	17.18
1248	26.75
1249	24.36
1250	23.42
1251	18.41
1252	22.87
1253	19.16
1254	9.355
1255	23.43
1256	15.86
1257	22.57
1258	8.431
1259	4.116
1260	10.82
1261	17.94
1262	18.14
1263	17.42
1264	16.4
1265	15.46
1266	14.58
1267	18.71
1268	19.15
1269	11.32
1270	10.75
1271	7.412
1272	7.258
1273	23.2
1274	5.712
1275	10.88
1276	20.54
1277	13.72
1278	15.43
1279	19.54
1280	15.95
1281	14.16
1282	20.87
1283	7.925
1284	12.09
1285	18.47
1286	17.61
1287	14.24
1288	24.53
1289	33.45
1290	15.39
1291	17.35
1292	18.12
1293	7.799
1294	13.04
1295	14.35
1296	19.08
1297	9.739
1298	26.96
1299	11.84
1300	10.56
1301	20.01
1302	12.06
1303	11.52
1304	16.25
1305	19.85
1306	24.39
1307	28.54
1308	21.86
1309	16.53
1310	11.72
1311	17.79
1312	10.03
1313	13.34
1314	19.7
1315	15.08
1316	11.49
1317	12.23
1318	15.39
1319	28.2
1320	20.46
1321	18.42
1322	15.33
1323	4.821
1324	5.509
1325	22.57
1326	19.32
1327	19.77
1328	16.87
1329	5.792
1330	12.56
1331	14.76
1332	12.36
1333	16.14
1334	20.41
1335	15.07
1336	16.99
1337	15.61
1338	19.89
1339	7.841
1340	20
1341	4.637
1342	13.29
1343	7.78
1344	15.64
1345	21.53
1346	20.49
1347	17.06
1348	10.95
1349	22.77
1350	11.61
1351	14.43
1352	9.057
1353	15.13
1354	23.11
1355	16.01
1356	10.57
1357	15.37
1358	17.02
1359	27.77
1360	13.92
1361	11.63
1362	24.71
1363	22.02
1364	16.83
1365	28.99
1366	19.59
1367	12.69
1368	17.56
1369	13.3
1370	12.56
1371	11.28
1372	11.5
1373	10.05
1374	9.929
1375	10.44
1376	17.24
1377	17.19
1378	13.5
1379	14.35
1380	16.21
1381	14.55
1382	10.48
1383	11.89
1384	8.151
1385	7.023
1386	23.94
1387	12.93
1388	6.345
1389	10.22
1390	20.68
1391	28.96
1392	11.64
1393	21.65
1394	19.73
1395	7.141
1396	23.5
1397	18.76
1398	18.35
1399	23.56
1400	18.1
1401	10.51
1402	9.373
1403	31.02
1404	19.69
1405	22.79
1406	7.392
1407	10.22
1408	19.39
1409	15.41
1410	22.18
1411	15.37
1412	16.62
1413	19.47
1414	12.83
1415	20.65
1416	15.08
1417	7.3
1418	18.16
1419	17.7
1420	17.93
1421	20.91
1422	26.8
1423	16.93
1424	29.72
1425	20.55
1426	22.91
1427	23.47
1428	26.45
1429	21.18
1430	19.5
1431	16.08
1432	20.65
1433	25.43
1434	15.77
1435	12.47
1436	12.08
1437	17.43
1438	11.1
1439	19.92
1440	10.15
1441	8.258
1442	20.91
1443	15.46
1444	5.115
1445	20.64
1446	18.3
1447	20.2
1448	22.35
1449	21.45
1450	17.59
1451	22.56
1452	15.54
1453	7.709
1454	10.46
1455	13.42
1456	17.41
1457	22.15
1458	12.57
1459	27.33
1460	11.59
1461	22.54
1462	8.168
1463	24.65
1464	14.8
1465	18.44
1466	24.47
1467	17.94
1468	16.42
1469	15.57
1470	4.548
1471	4.384
1472	20.34
1473	19.56
1474	9.017
1475	21.91
1476	5.102
1477	19.06
1478	10.44
1479	15.79
1480	13.01
1481	22.07
1482	21.14
1483	14.92
1484	17.01
1485	18
1486	24.1
1487	20.87
1488	23.7
1489	14.4
1490	14.49
1491	6.153
1492	11.46
1493	21.72
1494	17.58
1495	11.36
1496	16.44
1497	17.64
1498	25.23
1499	7.904
1500	8.318
1501	27.15
1502	24.23
1503	9.929
1504	7.177
1505	23.2
1506	6.832
1507	6.924
1508	19.97
1509	13.71
1510	11.56
1511	6.433
1512	19.74
1513	10.64
1514	21.35
1515	5.796
1516	7.788
1517	28.54
1518	11.42
1519	26.46
1520	15.45
1521	22.26
1522	11.83
1523	20.59
1524	7.865
1525	17.64
1526	20.88
1527	12.27
1528	12.51
1529	12.97
1530	14.29
1531	13.35
1532	14.38
1533	16.48
1534	15.3
1535	22.47
1536	19.48
1537	26.22
1538	25.03
1539	15.87
1540	16.47
1541	7.314
1542	20.51
1543	7.867
1544	8.188
1545	19.43
1546	25
1547	16.73
1548	15.91
1549	13.24
1550	13.84
1551	22.29
1552	14.75
1553	29.57
1554	26.72
1555	18.86
1556	14.02
1557	17.61
1558	16.43
1559	8.605
1560	15.22
1561	23.08
1562	5.717
1563	15.82
1564	17.41
1565	9.837
1566	11.83
1567	22.22
1568	18.69
1569	5.788
1570	25.75
1571	17.01
1572	11.74
1573	15.46
1574	27.03
1575	11.68
1576	15.12
1577	12.91
1578	20.45
1579	23.14
1580	18.7
1581	18.11
1582	19.6
1583	12.49
1584	31.05
1585	17.67
1586	9.76
1587	7.505
1588	18.19
1589	16.6
1590	8.72
1591	4.829
1592	6.831
1593	12.88
1594	25.69
1595	6.705
1596	10.1
1597	25.34
1598	18.01
1599	18.39
1600	21.89
1601	19.07
1602	16.04
1603	28.17
1604	22.01
1605	18.85
1606	5.599
1607	22.3
1608	21.96
1609	8.975
1610	7.345
1611	16.9
1612	16.53
1613	21.15
1614	17.74
1615	19.39
1616	10.79
1617	16.95
1618	22.96
1619	24.34
1620	21.75
1621	5.006
1622	18.12
1623	23.4
1624	20.04
1625	19.48
1626	21.12
1627	18.71
1628	14.4
1629	16.73
1630	19.14
1631	23.95
1632	15.26
1633	14.78
1634	11.46
1635	10.95
1636	10.25
1637	17.29
1638	13.17
1639	10.79
1640	14.57
1641	14.41
1642	15.3
1643	16.81
1644	20.69
1645	19.11
1646	13.48
1647	14.11
1648	6.207
1649	16.32
1650	10.62
1651	16.37
1652	18.36
1653	9.183
1654	19.24
1655	22.8
1656	15.17
1657	20.86
1658	13.28
1659	21.63
1660	18.2
1661	20.12
1662	10.16
1663	16.25
1664	23.88
1665	21.27
1666	23.15
1667	20.49
1668	5.272
1669	20.65
1670	29.44
1671	9.476
1672	16.46
1673	16.36
1674	16.58
1675	23.12
1676	23.85
1677	13.32
1678	11.76
1679	17.91
1680	28.19
1681	6.655
1682	9.719
1683	16.77
1684	19.76
1685	17.15
1686	19.41
1687	24.58
1688	21.1
1689	18.3
1690	13.48
1691	12.65
1692	19.42
1693	18.91
1694	4.312
1695	15.58
1696	6.922
1697	20.58
1698	19.2
1699	18.55
1700	23.18
1701	27.01
1702	20.2
1703	22.96
1704	13.88
1705	18.41
1706	8.395
1707	18.33
1708	17.69
1709	16.38
1710	32.21
1711	11.73
1712	17.71
1713	13.78
1714	10.29
1715	8.835
1716	18.88
1717	9.533
1718	17.84
1719	14.22
1720	12.78
1721	16.93
1722	11.47
1723	27.79
1724	14.83
1725	7.59
1726	23.55
1727	8.208
1728	23.24
1729	14.53
1730	10.95
1731	11.43
1732	11.85
1733	18.45
1734	13.31
1735	8.279
1736	11.6
1737	19.05
1738	23.58
1739	24.57
1740	11.8
1741	13.5
1742	18.63
1743	17.48
1744	22.23
1745	8.571
1746	8.365
1747	18.14
1748	13.44
1749	13.37
1750	24.9
1751	24.79
1752	20.67
1753	22.95
1754	11.49
1755	23
1756	18.93
1757	18.12
1758	21.93
1759	22.74
1760	22.06
1761	7.744
1762	12.72
1763	16.91
1764	18.32
1765	12.64
1766	19.12
1767	18.53
1768	15.76
1769	12.31
1770	12.03
1771	12.99
1772	21.48
1773	30.79
1774	4.985
1775	7.966
1776	22.45
1777	24.89
1778	25.98
1779	11.8
1780	26.66
1781	16.5
1782	20.66
1783	10.14
1784	7.796
1785	10.78
1786	13.41
1787	21.15
1788	17.5
1789	12.14
1790	21.8
1791	21.01
1792	12.27
1793	4.835
1794	16.43
1795	9.334
1796	24.42
1797	10.48
1798	22.43
1799	19.52
1800	11.34
1801	11.37
1802	16.83
1803	9.064
1804	15.86
1805	11.64
1806	14.61
1807	16.01
1808	11.13
1809	5.926
1810	22.6
1811	18.54
1812	13.73
1813	19.17
1814	11.46
1815	24.75
1816	15.12
1817	18.54
1818	16.49
1819	22.44
1820	13.08
1821	24.05
1822	21.53
1823	13.83
1824	14.01
1825	21.45
1826	16.87
1827	5.139
1828	30.79
1829	14.53
1830	20.99
1831	4.339
1832	15.62
1833	18.03
1834	17.87
1835	13.4
1836	9.519
1837	17.74
1838	14.05
1839	20.22
1840	14.26
1841	16.51
1842	16.31
1843	14.82
1844	14.02
1845	12.14
1846	15.31
1847	25.07
1848	35.16
1849	20.34
1850	12.79
1851	14.36
1852	13.49
1853	24.42
1854	12.53
1855	16.74
1856	19.43
1857	24.29
1858	15.88
1859	4.302
1860	17.67
1861	10.76
1862	10.11
1863	17.39
1864	20.06
1865	10.72
1866	22.15
1867	22.48
1868	25.09
1869	16.14
1870	24.36
1871	10.69
1872	12.56
1873	5.412
1874	12
1875	20.41
1876	20.59
1877	21.55
1878	10.87
1879	16.24
1880	20.62
1881	14.3
1882	20.3
1883	6.321
1884	13.2
1885	4.499
1886	19.8
1887	21.05
1888	17.43
1889	26.7
1890	18.3
1891	16.55
1892	27.95
1893	20.13
1894	13.19
1895	13.04
1896	22.62
1897	14.99
1898	16.79
1899	10.09
1900	13.01
1901	21.79
1902	11.97
1903	19.36
1904	23.97
1905	19.26
1906	12.19
1907	11.91
1908	11.72
1909	26.05
1910	26.19
1911	16.17
1912	16.59
1913	11.08
1914	15.89
1915	21.9
1916	9.181
1917	12.97
1918	14.71
1919	21.67
1920	21.74
1921	26.04
1922	15.17
1923	10.71
1924	4.764
1925	17.17
1926	17.25
1927	19.45
1928	13.72
1929	10.89
1930	22.7
1931	14.91
1932	12.81
1933	18.45
1934	21.25
1935	29.54
1936	17.1
1937	30.46
1938	21.74
1939	4.761
1940	24.65
1941	5.562
1942	4.938
1943	20.74
1944	24.13
1945	26.1
1946	10.22
1947	10.7
1948	23.62
1949	20.23
1950	19.71
1951	13.95
1952	9.316
1953	5.555
1954	17.89
1955	14.4
1956	15.17
1957	15.91
1958	16.63
1959	15.78
1960	10.58
1961	22.77
1962	16.1
1963	21.99
1964	16.4
1965	19.06
1966	13.73
1967	19.87
1968	17.71
1969	12.96
1970	18.33
1971	18.24
1972	19.26
1973	23.21
1974	12.37
1975	25.75
1976	27.1
1977	13.78
1978	10.33
1979	15.71
1980	13.26
1981	19.11
1982	16.53
1983	17.63
1984	25.46
1985	15.26
1986	5.83
1987	7.856
1988	25.75
1989	15.49
1990	23.48
1991	13.41
1992	13.24
1993	16.97
1994	21.3
1995	18.15
1996	25.77
1997	20.74
1998	14.31
[truncated: 3,012 more rows]
