# Supplementary material for: Cellular organization in lab-evolved and extant multicellular species obeys a maximum entropy law
Source: eLife journal article supplement (doi:10.7554/elife.72707), 2022-01-04
Supplement: fig5-data1 [file 2021-03-26-Petite-Gob21-Ace2KO-02.xlsx]

## Sheet: Sheet1
Sequence	Diameter
	µm
1	28.19
2	20.18
3	20.22
4	19.03
5	20.4
6	25.35
7	15.11
8	12.51
9	19.98
10	5.478
11	20.58
12	18.44
13	17.05
14	20.76
15	17.47
16	26.01
17	19.85
18	27.53
19	12.65
20	7.722
21	19.39
22	18.27
23	14.04
24	14.24
25	17.62
26	20.68
27	15.37
28	21.3
29	20.85
30	19.1
31	15.72
32	18.62
33	18.68
34	23.87
35	25.7
36	23.27
37	14.74
38	19.33
39	25.61
40	6.304
41	13.81
42	15.3
43	12.69
44	23.38
45	23.54
46	17.54
47	4.466
48	16.87
49	24.52
50	23.58
51	4.287
52	12.94
53	26.32
54	12.28
55	7.805
56	5.173
57	13.03
58	20.11
59	20.52
60	17.98
61	13.54
62	23.37
63	16.94
64	26.41
65	20.35
66	16.63
67	5.77
68	13.65
69	11.45
70	10.62
71	20.4
72	23.02
73	18.76
74	10.57
75	18.02
76	24.22
77	4.683
78	30.32
79	15.13
80	30.43
81	19.57
82	28
83	23.91
84	21.22
85	19.55
86	22.04
87	10.95
88	19.77
89	28.72
90	16.63
91	23.72
92	11.99
93	18.78
94	24.28
95	12.21
96	13.87
97	17.37
98	19.2
99	26.08
100	7.791
101	21.58
102	11.19
103	13.47
104	24.63
105	22.05
106	14.06
107	18.9
108	20.31
109	22.4
110	11.55
111	15.39
112	20.19
113	17.48
114	21.71
115	5.234
116	26.71
117	4.262
118	26.73
119	27.11
120	21.25
121	25.94
122	17.38
123	13.36
124	17.92
125	15.84
126	22.28
127	10.83
128	18.41
129	5.058
130	15.42
131	7.383
132	14.11
133	21.83
134	17.56
135	4.431
136	23.97
137	11.5
138	11.74
139	9.05
140	26.35
141	23.88
142	20.05
143	21.85
144	18.76
145	17.74
146	26.25
147	18.58
148	23.32
149	15.22
150	11.47
151	18.93
152	20.89
153	16.37
154	13.58
155	14.3
156	19.38
157	19.79
158	23.32
159	11.89
160	12.3
161	15.77
162	14.29
163	18.97
164	23.3
165	16.9
166	15.64
167	18.16
168	23.54
169	12.69
170	18.02
171	22.72
172	25.7
173	14.62
174	20.43
175	23.24
176	17.78
177	19.07
178	20.89
179	11.62
180	16.33
181	15.14
182	24.32
183	13.5
184	24.25
185	5.152
186	21.43
187	12.02
188	6.309
189	22.7
190	11.56
191	14.43
192	21.65
193	10.1
194	19.47
195	4.462
196	13.59
197	21.69
198	13.84
199	24.1
200	18
201	18.13
202	17.04
203	21.35
204	7.322
205	14.93
206	7.988
207	15.15
208	26.34
209	12.63
210	11.41
211	16.72
212	17.86
213	20.22
214	21.89
215	12.62
216	25.31
217	20.25
218	10.88
219	8.12
220	18.92
221	13.58
222	21.25
223	14.72
224	5.959
225	23.51
226	19.21
227	16.63
228	23.54
229	23.57
230	23.59
231	17.27
232	16.46
233	18.17
234	11.47
235	18.17
236	12.18
237	14.19
238	20.03
239	14.44
240	12.77
241	8.345
242	23.01
243	10.54
244	20.77
245	10.26
246	18.28
247	14.77
248	19.41
249	12.89
250	36.75
251	15.26
252	18.76
253	13.98
254	19.21
255	21.3
256	9.406
257	18.84
258	18.68
259	21.86
260	12.97
261	9.15
262	21.6
263	18.84
264	9.652
265	16.14
266	9.817
267	8.684
268	22
269	14.95
270	16.44
271	8.736
272	24.08
273	12.69
274	11.17
275	20.45
276	16.61
277	15.91
278	5.814
279	14.04
280	12.21
281	13.83
282	18.01
283	13.31
284	20.27
285	20.77
286	10.6
287	11.57
288	6.37
289	24.4
290	19.83
291	15.68
292	26.61
293	16.35
294	14.88
295	19.97
296	15.73
297	14.25
298	20.95
299	15.34
300	13.3
301	11.01
302	23.64
303	16.68
304	19.8
305	22.94
306	21.16
307	22.03
308	13.06
309	8.767
310	14.45
311	20.54
312	17.43
313	17.79
314	13.76
315	20.54
316	12.1
317	8.953
318	6.524
319	13.84
320	25.62
321	24.21
322	11.55
323	19.62
324	18.16
325	16.74
326	16.78
327	18.91
328	19.45
329	16.77
330	24.04
331	12.89
332	13.72
333	16.44
334	16.18
335	16.69
336	26.17
337	16.6
338	12.78
339	9.11
340	13.69
341	20.81
342	26.9
343	16.19
344	32.69
345	16.37
346	16.38
347	11.05
348	23.14
349	17.51
350	14.86
351	10.97
352	16.5
353	10.21
354	16.1
355	13.55
356	21.22
357	14.72
358	21.63
359	16.18
360	12.13
361	23.14
362	22.51
363	18.37
364	27
365	18.55
366	15.86
367	24.74
368	16.53
369	18.61
370	8.921
371	24.86
372	16
373	22.76
374	9.751
375	13.65
376	13.73
377	16.67
378	21.35
379	13.36
380	22.8
381	14.11
382	13.67
383	13.08
384	20.9
385	17.5
386	20.91
387	21.77
388	18.16
389	16.39
390	14.12
391	30.33
392	23.63
393	25.36
394	18.08
395	23.78
396	9.133
397	19.52
398	6.638
399	22.12
400	23.59
401	11.51
402	18.1
403	13.72
404	19.95
405	15.36
406	11.58
407	8.319
408	23.03
409	17.44
410	12.36
411	15.07
412	19.43
413	14
414	17.91
415	17.26
416	21.15
417	13.9
418	20.13
419	22.8
420	13.43
421	7.823
422	12.98
423	8.58
424	9.971
425	18.65
426	22.04
427	20.48
428	6.269
429	12.47
430	27.57
431	13
432	15.08
433	19.52
434	17.84
435	21.44
436	9.567
437	19.45
438	27.56
439	16.38
440	21.1
441	16.94
442	4.683
443	11.67
444	6.281
445	23.51
446	17.92
447	23.48
448	16.2
449	17.48
450	12.11
451	15.09
452	16.24
453	12.25
454	20.19
455	24.8
456	9.412
457	20.76
458	18.69
459	11.29
460	18.25
461	15.73
462	5.527
463	21.39
464	24.67
465	11.46
466	19.32
467	26.44
468	20.38
469	16.85
470	8.143
471	8.871
472	16.23
473	17.45
474	4.279
475	21.21
476	19.81
477	17.21
478	16.83
479	19.61
480	11.74
481	9.948
482	20.22
483	21.8
484	11.84
485	16.5
486	15.34
487	6.661
488	26.02
489	15.74
490	17.96
491	17.75
492	18.51
493	21.94
494	13.53
495	9.717
496	21.7
497	11.38
498	6.433
499	23.91
500	19.53
501	17.61
502	7.314
503	11.2
504	24.21
505	5.074
506	19.7
507	13.24
508	10.19
509	20.67
510	13.79
511	7.504
512	14.02
513	10.89
514	14.36
515	4.878
516	8.544
517	14.71
518	24.04
519	19.86
520	21.29
521	11.85
522	14.12
523	14.62
524	17.91
525	16.09
526	18.02
527	23.22
528	11.68
529	19.5
530	15.42
531	20.96
532	19.09
533	21.49
534	9.919
535	14.01
536	9.196
537	19.41
538	21.47
539	20.5
540	18.08
541	11.02
542	10.29
543	16.43
544	4.265
545	14.72
546	15.05
547	17.74
548	10.83
549	14.27
550	18.31
551	20.67
552	12.44
553	14.97
554	19.24
555	20.02
556	21.13
557	14.53
558	23.31
559	22.49
560	15.18
561	10.16
562	15.88
563	9.064
564	31.81
565	12.09
566	10.74
567	11.87
568	23.61
569	20.46
570	24.49
571	11.56
572	21.76
573	6.821
574	23.7
575	5.511
576	8.171
577	20.98
578	13.03
579	22.67
580	12.76
581	6.854
582	18.39
583	18.96
584	17.35
585	27.83
586	17.09
587	22.92
588	24.39
589	18.31
590	25.6
591	16.66
592	23.8
593	21.42
594	21.53
595	23.19
596	10.46
597	18.72
598	12.22
599	18.19
600	25.27
601	9.023
602	24.59
603	15.18
604	17.83
605	13.02
606	18.71
607	8.765
608	15.08
609	15.66
610	17.87
611	13.05
612	12.12
613	16.18
614	10.29
615	19.19
616	28.49
617	18.52
618	10.13
619	21.35
620	19.81
621	7.357
622	19.26
623	21.41
624	13.07
625	17.42
626	17.98
627	18.41
628	8.993
629	5.135
630	14.32
631	15.31
632	9.031
633	28.44
634	16.82
635	23.6
636	11.85
637	13.82
638	20.27
639	17.66
640	15.4
641	7.734
642	10.28
643	18.31
644	18.73
645	24.91
646	17.36
647	21.09
648	16.59
649	23.19
650	27.05
651	15.98
652	22.83
653	15.29
654	26.28
655	18.98
656	22.71
657	27.85
658	12.76
659	7.515
660	18.34
661	12.21
662	11
663	27.14
664	11.74
665	9.627
666	18.89
667	23.99
668	20.09
669	16.02
670	13.18
671	12.87
672	16.55
673	12.19
674	15.26
675	27.25
676	17.63
677	15.97
678	20.87
679	28.74
680	16.24
681	12.83
682	10.34
683	8.534
684	17.17
685	17.19
686	13.38
687	11.34
688	16.7
689	17.47
690	17.35
691	15.92
692	17.58
693	15.51
694	17.21
695	32.59
696	15.56
697	9.395
698	22.87
699	11.58
700	7.003
701	16.75
702	21.32
703	22.52
704	14.95
705	13.75
706	14.35
707	23.37
708	18.06
709	17.06
710	9.089
711	15.21
712	17.5
713	12.25
714	13.93
715	14.78
716	14.64
717	10.36
718	16.17
719	10.36
720	13.69
721	19.24
722	15.9
723	15.49
724	12.94
725	16.46
726	20.58
727	20.38
728	21.04
729	7.754
730	22.15
731	5.532
732	23.85
733	16.74
734	14.14
735	9.961
736	12.57
737	8.22
738	20.61
739	23.53
740	20.66
741	4.876
742	11.51
743	13.81
744	21.42
745	17.12
746	20.19
747	13.37
748	5.401
749	23
750	11.28
751	18.15
752	23.81
753	20.55
754	23.29
755	15.08
756	16.49
757	15.32
758	14.55
759	15.4
760	4.413
761	13.32
762	25.76
763	7.223
764	20.38
765	19.6
766	22.18
767	17.41
768	17.69
769	15.69
770	14.57
771	13.9
772	26.99
773	20.07
774	14.76
775	25.13
776	10.85
777	14.26
778	16.38
779	12.67
780	12.43
781	23.55
782	7.392
783	24.18
784	20.19
785	17.19
786	24.96
787	21.67
788	8.87
789	15.85
790	22.14
791	7.75
792	14.67
793	21.62
794	21.43
795	21.19
796	6.434
797	23.76
798	16.79
799	19.48
800	10.44
801	19.95
802	4.652
803	24.54
804	16.43
805	29.06
806	27.92
807	19.57
808	9.07
809	14.73
810	14.13
811	6.389
812	16.73
813	13.87
814	23.07
815	17.76
816	15.63
817	19.51
818	24.05
819	17.59
820	10.7
821	11.26
822	23.26
823	21.74
824	16.55
825	22.54
826	23.38
827	15.37
828	14.64
829	13.63
830	13.07
831	12.75
832	7.823
833	18.68
834	11.64
835	22.68
836	17.74
837	6.65
838	9.437
839	18.36
840	19.82
841	13.34
842	8.437
843	7.159
844	19.56
845	10.12
846	22.63
847	8.315
848	19.23
849	15.76
850	16.14
851	17.78
852	24.14
853	14.09
854	20.42
855	5.662
856	7.339
857	16.6
858	16.74
859	33.3
860	4.691
861	14.07
862	19.92
863	18.42
864	6.822
865	17.87
866	25.28
867	13.52
868	13.83
869	23.04
870	16.55
871	20.01
872	14.72
873	17.33
874	16.47
875	19.36
876	11.23
877	7.531
878	27.19
879	19.55
880	19.9
881	17.45
882	11.46
883	14.19
884	27.34
885	19.16
886	18.99
887	6.38
888	10.31
889	20.5
890	9.392
891	20.52
892	18.69
893	4.182
894	15.96
895	12.62
896	22.33
897	25.61
898	21.15
899	14.77
900	10.66
901	19.27
902	19.87
903	19.14
904	16.05
905	4.105
906	18.03
907	24.35
908	8.637
909	19.28
910	22.88
911	6.28
912	15.12
913	17.88
914	19.16
915	11.58
916	16.15
917	16.88
918	19.99
919	15.56
920	14.57
921	27.84
922	24.54
923	15.43
924	15.14
925	24.7
926	30.69
927	18.96
928	23.57
929	18.24
930	5.991
931	14
932	30.51
933	27.62
934	8.916
935	14.42
936	14.52
937	15.97
938	19.42
939	18.15
940	20.47
941	14.06
942	13.74
943	16.84
944	19.26
945	22.96
946	15.78
947	20.59
948	19.5
949	17.06
950	14.56
951	14.79
952	16.64
953	5.501
954	8.319
955	12.67
956	15.91
957	5.24
958	22.04
959	17.71
960	20.43
961	17.4
962	25.81
963	18.19
964	19.92
965	4.948
966	7.251
967	19.24
968	6.035
969	26.15
970	17.74
971	26.82
972	20.29
973	22.56
974	7.362
975	10.74
976	13.34
977	14.66
978	22.41
979	18.93
980	16.91
981	19.13
982	20.97
983	15.31
984	18.99
985	18.42
986	15.36
987	16.64
988	17.29
989	22.51
990	5.071
991	23.55
992	13.03
993	23.34
994	22.97
995	14.43
996	17.12
997	14.57
998	18.11
999	25.62
1000	18.01
1001	7.892
1002	22.25
1003	7.484
1004	15.89
1005	10.7
1006	24.5
1007	22.21
1008	25.3
1009	8.887
1010	21.15
1011	10.73
1012	18.51
1013	14.36
1014	13.79
1015	11.61
1016	5.818
1017	21.08
1018	12.74
1019	19.8
1020	15.58
1021	9.618
1022	15.62
1023	28.02
1024	17.57
1025	15.06
1026	17.36
1027	20.3
1028	11.91
1029	17.11
1030	15.59
1031	14.51
1032	4.781
1033	18.02
1034	18.27
1035	14.33
1036	20.84
1037	18.01
1038	13.09
1039	24.28
1040	12.93
1041	8.794
1042	15.37
1043	19
1044	28.99
1045	17.06
1046	26.12
1047	11.06
1048	20.79
1049	13.91
1050	8.591
1051	18.64
1052	29.05
1053	7.573
1054	13.9
1055	17.83
1056	19.64
1057	8.489
1058	21.08
1059	18.84
1060	21.27
1061	13.05
1062	22.06
1063	13.96
1064	14.53
1065	11.45
1066	31.1
1067	17.23
1068	22.86
1069	9.661
1070	23.65
1071	15.65
1072	19.84
1073	24.05
1074	18.51
1075	12.8
1076	10.02
1077	4.572
1078	16.93
1079	18.93
1080	28.76
1081	23.75
1082	12.11
1083	14.9
1084	5.834
1085	12.68
1086	13.39
1087	18.64
1088	13.61
1089	18.4
1090	15.52
1091	6.531
1092	19.99
1093	25.46
1094	15.68
1095	22.22
1096	4.081
1097	7.582
1098	15.52
1099	13.79
1100	19.57
1101	20.98
1102	17.34
1103	9.335
1104	16.79
1105	20.77
1106	5.52
1107	23.48
1108	25.66
1109	11.47
1110	21.35
1111	11.26
1112	26.63
1113	12.66
1114	20.97
1115	17.84
1116	27.07
1117	19.88
1118	9.821
1119	15.29
1120	12.43
1121	18.13
1122	15.9
1123	16.26
1124	17.37
1125	13.72
1126	12.98
1127	14.42
1128	12.46
1129	25.22
1130	5.614
1131	4.095
1132	13.87
1133	11.67
1134	9.481
1135	4.121
1136	18.64
1137	6.003
1138	29.09
1139	21.71
1140	4.204
1141	21.01
1142	13.72
1143	6.239
1144	16.39
1145	28.6
1146	24.78
1147	21.18
1148	18.46
1149	19.59
1150	16.4
1151	14.65
1152	13.74
1153	24.43
1154	11.51
1155	11.06
1156	22.68
1157	22.11
1158	20.87
1159	9.419
1160	23.65
1161	12.56
1162	8.742
1163	28.91
1164	10.15
1165	14.72
1166	25.05
1167	23.02
1168	25.88
1169	17.83
1170	27.61
1171	28.9
1172	10.76
1173	20.08
1174	16.21
1175	36.18
1176	9.733
1177	26.03
1178	13.06
1179	23.59
1180	18.02
1181	25.85
1182	18.4
1183	17.81
1184	23.22
1185	7.508
1186	10.3
1187	8.689
1188	7.259
1189	16.54
1190	15.07
1191	16.35
1192	17.15
1193	5.836
1194	17.67
1195	22.78
1196	15.3
1197	10.52
1198	15.18
1199	16.4
1200	23.95
1201	7.965
1202	13.64
1203	7.828
1204	13.39
1205	15.24
1206	14.91
1207	8.608
1208	10.17
1209	7.081
1210	11.74
1211	16.15
1212	20.69
1213	10.35
1214	11.27
1215	11.79
1216	17.04
1217	19.85
1218	17.23
1219	21.68
1220	15.51
1221	25.15
1222	19.75
1223	8.437
1224	8.694
1225	20.23
1226	21.55
1227	12.86
1228	17.52
1229	21.56
1230	14.78
1231	19.01
1232	11.39
1233	16.83
1234	13.9
1235	10.12
1236	18.13
1237	25.83
1238	26.43
1239	20.31
1240	12.78
1241	18.19
1242	21.96
1243	15.23
1244	20.52
1245	16.78
1246	5.913
1247	12.14
1248	13.79
1249	22.58
1250	16.59
1251	11.22
1252	21.39
1253	23.43
1254	18.1
1255	18.01
1256	15.74
1257	9.481
1258	15.7
1259	15.49
1260	4.726
1261	25.98
1262	20.13
1263	19.51
1264	17.52
1265	13.38
1266	25.83
1267	5.424
1268	7.423
1269	15.52
1270	16.15
1271	9
1272	18.57
1273	30.74
1274	14.06
1275	13.23
1276	4.636
1277	16.12
1278	25.71
1279	16.99
1280	10.64
1281	7.403
1282	13.11
1283	19.6
1284	21.73
1285	14.66
1286	24.21
1287	12.08
1288	18.37
1289	12.94
1290	24.04
1291	13.59
1292	19.16
1293	20.78
1294	24.25
1295	22.82
1296	13.72
1297	5.365
1298	19.93
1299	17.27
1300	6.093
1301	15.37
1302	19.18
1303	5.241
1304	17.64
1305	21.43
1306	11.29
1307	10.55
1308	22.78
1309	9.189
1310	35.79
1311	22.59
1312	20.93
1313	12.12
1314	27.05
1315	13.7
1316	15.36
1317	17.69
1318	12.07
1319	22.92
1320	6.026
1321	9.87
1322	9.674
1323	9.971
1324	21.13
1325	20.24
1326	19.4
1327	18.21
1328	15.43
1329	10.14
1330	12.47
1331	13.84
1332	4.804
1333	10.72
1334	4.205
1335	18.18
1336	10.17
1337	23.25
1338	20.56
1339	15.47
1340	19.82
1341	14.11
1342	13.81
1343	28.32
1344	19.18
1345	17.63
1346	23.36
1347	12.95
1348	13.74
1349	13.47
1350	15.5
1351	8.238
1352	15.6
1353	9.102
1354	21.49
1355	27.63
1356	4.91
1357	13.48
1358	6.25
1359	16.68
1360	4.791
1361	13.43
1362	22.97
1363	9.742
1364	27.16
1365	25.01
1366	18.75
1367	23.54
1368	19.14
1369	21
1370	21.77
1371	18.49
1372	13.51
1373	5.398
1374	16.56
1375	10.72
1376	9.292
1377	21.17
1378	16.49
1379	9.917
1380	13.75
1381	15.74
1382	26.86
1383	10.25
1384	15.51
1385	22.52
1386	11.29
1387	23.05
1388	16.64
1389	19.25
1390	19.96
1391	19.37
1392	14.84
1393	31.8
1394	24.4
1395	16.12
1396	24.09
1397	13.77
1398	20.03
1399	13.38
1400	22.69
1401	12.85
1402	21.94
1403	14.42
1404	29.23
1405	19.26
1406	11.39
1407	7.22
1408	10.42
1409	11.73
1410	23.7
1411	18.43
1412	23.06
1413	10.47
1414	15.73
1415	23.8
1416	21.9
1417	11.38
1418	9.679
1419	18.81
1420	15.58
1421	21.07
1422	16.72
1423	15.88
1424	9.058
1425	26.01
1426	6.711
1427	25.04
1428	18.24
1429	15.65
1430	14.11
1431	12.41
1432	16.19
1433	18.7
1434	18.82
1435	5.392
1436	26.84
1437	15.74
1438	24.4
1439	16.11
1440	15.12
1441	18.47
1442	16.16
1443	20.53
1444	26.84
1445	8.095
1446	23.04
1447	15.44
1448	15.41
1449	14.92
1450	19.74
1451	14.21
1452	19.44
1453	12.4
1454	13.58
1455	20.83
1456	15.7
1457	13.8
1458	19.64
1459	12.08
1460	9.533
1461	17.39
1462	21.57
1463	19.16
1464	15.54
1465	25.81
1466	23.32
1467	4.291
1468	11.89
1469	15.02
1470	10.13
1471	12.79
1472	17.67
1473	22.16
1474	19.42
1475	14.95
1476	18.66
1477	19.09
1478	13.05
1479	30.74
1480	12.01
1481	11.95
1482	17.09
1483	14.91
1484	21.25
1485	13.68
1486	6.881
1487	9.151
1488	19.28
1489	18.68
1490	14.24
1491	17.91
1492	19.67
1493	16.94
1494	11.33
1495	7.456
1496	26.53
1497	14.71
1498	31.3
1499	20.43
1500	13.53
1501	16.44
1502	13.16
1503	14.2
1504	21.45
1505	11.17
1506	4.597
1507	23.72
1508	13.89
1509	16.8
1510	21.54
1511	21.54
1512	11.15
1513	13.38
1514	25.13
1515	4.545
1516	12.36
1517	8.427
1518	17.19
1519	14.46
1520	17.92
1521	16.78
1522	9.79
1523	9.854
1524	13.95
1525	12
1526	11.87
1527	20.27
1528	18.82
1529	20.28
1530	18.63
1531	32.99
1532	28.73
1533	14.17
1534	19.49
1535	23.83
1536	18.38
1537	12.88
1538	18.72
1539	19.74
1540	17.44
1541	26.16
1542	13.92
1543	20.19
1544	16.49
1545	12.64
1546	11.56
1547	16.3
1548	12.65
1549	21.64
1550	20.74
1551	7.364
1552	8.868
1553	13.43
1554	18.04
1555	10.59
1556	14.96
1557	12.68
1558	9.686
1559	20.04
1560	15.83
1561	12.87
1562	16.23
1563	21.8
1564	13.83
1565	11.12
1566	16.77
1567	16.59
1568	15.37
1569	14.86
1570	12.18
1571	25.93
1572	15.41
1573	13.8
1574	4.002
1575	15.73
1576	30.41
1577	20.15
1578	8.474
1579	18.01
1580	13.34
1581	15.42
1582	20.2
1583	17.7
1584	21.59
1585	16.94
1586	26.25
1587	14.4
1588	11.83
1589	18.11
1590	21.96
1591	29.31
1592	15.5
1593	20.97
1594	19.24
1595	20.18
1596	17.17
1597	25.28
1598	16.64
1599	15.48
1600	13.69
1601	16
1602	11.35
1603	12.87
1604	16.83
1605	18.01
1606	11.62
1607	18.61
1608	17.38
1609	18.96
1610	7.968
1611	22.56
1612	19.05
1613	14.23
1614	20.41
1615	20.75
1616	12.72
1617	26.72
1618	20.17
1619	13.2
1620	18.1
1621	8.793
1622	7.796
1623	21.76
1624	14.46
1625	25.25
1626	18.43
1627	18.2
1628	8.087
1629	17.74
1630	22.62
1631	10.76
1632	22.79
1633	34.2
1634	11
1635	25.8
1636	10.35
1637	13.66
1638	12.57
1639	7.366
1640	14.35
1641	20.64
1642	11.9
1643	24.21
1644	21.48
1645	19.08
1646	27.72
1647	16.67
1648	12.25
1649	18.39
1650	31.84
1651	14.56
1652	29.37
1653	12.82
1654	16.86
1655	20.73
1656	24.23
1657	16.43
1658	19.24
1659	14.92
1660	18.02
1661	9.678
1662	18.75
1663	19.45
1664	7.036
1665	14.37
1666	22.78
1667	22.99
1668	12.37
1669	21.35
1670	6.029
1671	29.04
1672	15.89
1673	22.75
1674	8.668
1675	11.42
1676	18.11
1677	13.12
1678	14.88
1679	12.39
1680	16.38
1681	13.35
1682	29.41
1683	22.29
1684	23.37
1685	21.9
1686	16.02
1687	14.48
1688	4.758
1689	19.33
1690	18.57
1691	25.12
1692	14.02
1693	6.817
1694	19.31
1695	14.58
1696	18.7
1697	19.45
1698	9.122
1699	13.22
1700	23.56
1701	20.07
1702	17.85
1703	19.46
1704	14.54
1705	19.59
1706	20.64
1707	17.32
1708	19.03
1709	16.99
1710	6.393
1711	26.12
1712	9.708
1713	18.3
1714	16.97
1715	5.65
1716	16.2
1717	21.11
1718	24.82
1719	14.86
1720	26.68
1721	11.26
1722	12.26
1723	15.58
1724	5.799
1725	20.65
1726	8.793
1727	18.77
1728	13.22
1729	18.85
1730	18.99
1731	24.39
1732	18.33
1733	23.88
1734	15.25
1735	22.78
1736	15.53
1737	20.18
1738	21.02
1739	17.58
1740	18.24
1741	16.76
1742	20.04
1743	23.35
1744	13.31
1745	19.6
1746	6.888
1747	11.54
1748	23.72
1749	19.84
1750	10.19
1751	16.81
1752	15.66
1753	20.97
1754	22.55
1755	16.17
1756	12.01
1757	6.333
1758	10.62
1759	4.696
1760	19.79
1761	5.863
1762	23.5
1763	20.09
1764	11.34
1765	15.75
1766	14.55
1767	23.23
1768	17.86
1769	15.94
1770	25
1771	15.63
1772	16.82
1773	20.67
1774	23.34
1775	19.18
1776	4.049
1777	4.105
1778	8.316
1779	17.19
1780	25.47
1781	11.24
1782	13.63
1783	8.462
1784	18.24
1785	13.16
1786	17.3
1787	21.41
1788	12.99
1789	18.39
1790	18.59
1791	25.76
1792	19.58
1793	20.22
1794	23.72
1795	16.58
1796	10.45
1797	20.6
1798	10.41
1799	19.05
1800	4.496
1801	17.76
1802	10.04
1803	19.05
1804	17.4
1805	6.928
1806	19.8
1807	22.74
1808	22.95
1809	18.34
1810	17.57
1811	11.3
1812	24.62
1813	16.21
1814	26.43
1815	11.9
1816	10.56
1817	25.6
1818	14.73
1819	22.09
1820	6.304
1821	16.91
1822	28.54
1823	12.31
1824	21.06
1825	22.96
1826	12.21
1827	19.6
1828	11.9
1829	22.41
1830	26.62
1831	25.2
1832	13.28
1833	5.241
1834	23.08
1835	14.49
1836	14.8
1837	20.04
1838	20.41
1839	15.24
1840	22.94
1841	17.45
1842	14.56
1843	10.3
1844	6.249
1845	19.44
1846	14.16
1847	25.07
1848	11.67
1849	16.87
1850	25.65
1851	16.01
1852	21.93
1853	16.33
1854	13.73
1855	21.38
1856	16.57
1857	21.39
1858	16.96
1859	16.28
1860	20.83
1861	28.8
1862	10.68
1863	19.89
1864	17.43
1865	25.25
1866	19.38
1867	14.23
1868	15.85
1869	15.9
1870	10.51
1871	20.05
1872	21.81
1873	19.25
1874	17.36
1875	9.65
1876	12.24
1877	6.643
1878	9.589
1879	14.86
1880	15
1881	13.84
1882	9.562
1883	13.78
1884	15.13
1885	14.24
1886	6.07
1887	19.56
1888	4.736
1889	18.96
1890	16.95
1891	18.77
1892	17.72
1893	22.21
1894	13.79
1895	10.19
1896	19.74
1897	20.08
1898	13.63
1899	15.64
1900	32.58
1901	22.51
1902	13.75
1903	12.22
1904	21.76
1905	20.37
1906	15.81
1907	15.13
1908	14.21
1909	31.58
1910	11.11
1911	21.89
1912	23.16
1913	20.76
1914	22.46
1915	12.6
1916	5.35
1917	8.798
1918	9.906
1919	18.65
1920	18.22
1921	19.11
1922	5.788
1923	19.17
1924	17.15
1925	20.51
1926	4.117
1927	20.2
1928	8.332
1929	13.26
1930	25.21
1931	11.5
1932	16.97
1933	21.91
1934	11.79
1935	20.38
1936	19.55
1937	24.57
1938	11.42
1939	16.36
1940	23.37
1941	25.05
1942	28.95
1943	21.24
1944	11.75
1945	20.71
1946	15.73
1947	11.55
1948	19.73
1949	14.05
1950	14.97
1951	27.01
1952	7.065
1953	15.92
1954	25.94
1955	16.31
1956	7.127
1957	30.04
1958	16.61
1959	10.83
1960	18.8
1961	13.28
1962	12.63
1963	9.083
1964	10.53
1965	10.37
1966	11.53
1967	24.39
1968	21.5
1969	27.37
1970	15.78
1971	17.89
1972	15.69
1973	17.29
1974	18.63
1975	19.09
1976	10.75
1977	15.21
1978	12.16
1979	12.1
1980	18.39
1981	10.77
1982	14.23
1983	8.572
1984	18.96
1985	15.07
1986	17.99
1987	23.28
1988	17.06
1989	23
1990	14.54
1991	4.849
1992	28.05
1993	21.44
1994	16.84
1995	12.76
1996	16.3
1997	18.78
1998	13.85
[truncated: 3,012 more rows]
